# Supplementary material for: Molecular chaperones DnaK and DnaJ share predicted binding sites on most proteins in the E. coli proteome
Source: Royal Society of Chemistry journal article supplement (doi:10.1039/c2mb25145k), 2012-05-24
Supplement: c2mb25145k.pdf [file c2mb25145k.pdf]

**MOLECULAR CHAPERONES DNAK AND DNAJ SHARE PREDICTED  
BINDING SITES ON MOST PROTEINS IN THE *E. COLI* PROTEOME**

**Sharan R. Srinivasan<sup>1</sup>, Anne Gillies<sup>1</sup>, Lyra Chang<sup>1</sup>, Andrea D. Thompson<sup>1</sup> and Jason E. Gestwicki<sup>1,2</sup>**

\*Both authors contributed equally to this work, From the Chemical Biology Graduate Program<sup>1</sup>, Department of Pathology and Biological Chemistry and the Life Sciences Institute<sup>2</sup>.  
University of Michigan Ann Arbor, MI 48109

**SUPPLEMENTAL FIGURES AND TABLES**

| Position | 1     | 2     | 3     | 4     | 5     | 6     | 7     | 8     | 9     | 10    | 11    | 12    | 13    |
|----------|-------|-------|-------|-------|-------|-------|-------|-------|-------|-------|-------|-------|-------|
| A        | 0.99  | 0.72  | 1.46  | 0.51  | 1.14  | 0.51  | 1.39  | -0.15 | 1.46  | 0.06  | 0.41  | 1.50  | 0.91  |
| C        | 0.99  | 0.96  | 0.94  | 0.96  | 0.99  | -1.21 | 0.49  | 0.96  | -4.21 | 0.99  | 0.51  | 0.52  | 0.53  |
| D        | -0.23 | 1.46  | 0.17  | 1.78  | 2.60  | 0.75  | 0.94  | 0.63  | 2.66  | 0.99  | 4.50  | -0.36 | -0.24 |
| E        | 5.36  | 0.72  | -0.06 | 1.60  | 0.61  | 1.07  | 1.02  | 2.17  | 0.39  | -1.08 | 2.17  | 1.89  | -1.74 |
| F        | -0.87 | -0.89 | 2.08  | -2.05 | -1.40 | -1.76 | -3.30 | -3.26 | -2.30 | -2.45 | -3.26 | -2.26 | -0.02 |
| G        | -0.82 | -0.32 | -0.06 | -0.85 | -0.20 | 1.16  | -1.23 | 1.05  | 2.04  | -0.02 | 1.05  | -0.85 | 0.90  |
| H        | 0.54  | -1.76 | -0.06 | 0.51  | -1.73 | -0.04 | 0.49  | 1.16  | 1.95  | 0.54  | -0.04 | 2.24  | 0.53  |
| I        | 4.42  | -0.20 | -0.58 | -0.62 | -2.12 | -0.46 | -0.19 | -3.21 | -1.23 | -0.87 | -1.56 | -0.84 | -1.90 |
| K        | -1.47 | -0.62 | -1.17 | -0.04 | 4.42  | 0.79  | -0.34 | 2.47  | 0.23  | 0.82  | 0.39  | 0.80  | -0.63 |
| L        | -0.73 | 0.40  | -1.20 | -0.75 | -1.38 | -0.16 | 2.73  | 0.40  | -0.90 | 0.39  | -1.47 | -1.10 | 0.84  |
| M        | 0.70  | 1.97  | 0.94  | 0.16  | 2.25  | 0.96  | -0.78 | 1.97  | 2.86  | 0.18  | -0.37 | 0.98  | -0.74 |
| N        | -2.37 | 1.57  | -0.06 | -0.15 | 0.77  | -1.28 | -0.17 | 0.08  | -1.45 | 1.90  | 0.75  | 1.24  | 1.80  |
| P        | 0.39  | 0.16  | 1.57  | -0.04 | 1.37  | 0.96  | 1.88  | 2.15  | 2.44  | 3.78  | 1.26  | 1.69  | 1.29  |
| Q        | 0.77  | -1.28 | 0.80  | 1.57  | -0.14 | 0.82  | -1.02 | -1.43 | 0.80  | -0.73 | 1.10  | -0.03 | 0.53  |
| R        | -0.73 | -1.15 | -1.78 | -1.21 | -2.19 | -1.76 | -1.52 | -2.21 | -1.51 | -0.12 | -1.52 | -1.19 | -1.48 |
| S        | 0.27  | -0.87 | 0.86  | 0.25  | -0.47 | -0.13 | 2.12  | 2.68  | 1.41  | 0.36  | 0.41  | -0.74 | 0.36  |
| T        | 0.88  | -0.26 | 1.55  | 0.20  | -0.73 | 4.69  | -0.90 | -0.15 | 0.17  | 0.88  | 0.41  | 0.87  | 2.80  |
| V        | -0.31 | 1.60  | 1.49  | 1.35  | 3.49  | 0.34  | -0.43 | -0.04 | 0.32  | -1.35 | 0.51  | 0.80  | -0.82 |
| W        | -0.02 | -0.04 | -2.49 | -2.47 | -0.02 | -4.48 | -0.06 | -0.04 | -3.50 | 0.54  | -2.47 | -0.74 | 0.53  |
| Y        | -1.18 | -1.31 | -0.99 | -0.26 | -0.53 | -0.97 | 2.86  | 0.34  | -0.06 | -1.18 | -0.56 | 1.17  | -0.24 |

**Supplementary Table S1.**  $\Delta\Delta G_{\text{binding}}$  values for DnaJ's affinity to every amino acid at each possible position in a 13mer binding site.

|                                           |               |
|-------------------------------------------|---------------|
| Number of Proteins in Proteome            | 4,303         |
| Number of Proteins with DnaK Sites        | 4,215         |
| Total number of DnaK Sites                | 95,558        |
| Average start point (% of protein length) | 46.03 ± 28.53 |
| Average $\Delta\Delta G_{\text{binding}}$ | -7.43 ± 2.08  |
| Average number of sites per protein       | 22.67 ± 18.66 |
| % Binding site coverage                   | 7.15 ± 4.16   |

**Supplementary Table S2.** Statistical analysis of DnaK Binding sites in *E. coli*

|                                           |               |
|-------------------------------------------|---------------|
| Number of Proteins in Proteome            | 4,303         |
| Number of Proteins with DnaJ Sites        | 4,294         |
| Total number of DnaJ Sites                | 224,530       |
| Average start point (% of protein length) | 47 ± 28       |
| Average $\Delta\Delta G_{\text{binding}}$ | -4.69 ± 2.27  |
| Average number of sites per protein       | 52.29 ± 38.76 |
| % Binding site coverage                   | 16.29 ± 6.23  |

**Supplementary Table S3.** Statistical analysis of DnaJ Binding sites in *E. coli*

sp|P0A6A8|ACP\_ECOLI Acyl carrier protein OS=Escherichia coli (strain K12) GN=acpP PE=1 SV=2  
 sp|C1P605|AZUC\_ECOLI Uncharacterized protein AzuC OS=Escherichia coli (strain K12) GN=azuC PE=1 SV=1  
 sp|P0AE63|CHAB\_ECOLI Cation transport regulator ChaB OS=Escherichia coli (strain K12) GN=chaB PE=1 SV=1  
 sp|P28307|CSGA\_ECOLI Major curlin subunit OS=Escherichia coli (strain K12) GN=csgA PE=1 SV=3  
 sp|P0A9X9|CSPA\_ECOLI Cold shock protein CspA OS=Escherichia coli (strain K12) GN=cspA PE=1 SV=2  
 sp|P36995|CSPB\_ECOLI Cold shock-like protein CspB OS=Escherichia coli (strain K12) GN=cspB PE=2 SV=1  
 sp|P0A9Y6|CSPC\_ECOLI Cold shock-like protein CspC OS=Escherichia coli (strain K12) GN=cspC PE=1 SV=2  
 sp|P0A972|CSPE\_ECOLI Cold shock-like protein CspE OS=Escherichia coli (strain K12) GN=cspE PE=1 SV=2  
 sp|P0A978|CSPG\_ECOLI Cold shock-like protein CspG OS=Escherichia coli (strain K12) GN=cspG PE=1 SV=1  
 sp|P0A986|CSPJ\_ECOLI Cold shock-like protein CspJ OS=Escherichia coli (strain K12) GN=cspJ PE=3 SV=1  
 sp|P27838|CYAY\_ECOLI Protein CyaY OS=Escherichia coli (strain K12) GN=cyaY PE=1 SV=1  
 sp|P0ACF4|DBHB\_ECOLI DNA-binding protein HU-beta OS=Escherichia coli (strain K12) GN=hupB PE=1 SV=1  
 sp|P0ABR1|DINI\_ECOLI DNA-damage-inducible protein I OS=Escherichia coli (strain K12) GN=dinI PE=1 SV=1  
 sp|P0A9R4|FER\_ECOLI 2Fe-2S ferredoxin OS=Escherichia coli (strain K12) GN=fdx PE=1 SV=2  
 sp|P0A8P3|FETP\_ECOLI Probable Fe(2+)-trafficking protein OS=Escherichia coli (strain K12) GN=yggX PE=1 SV=2  
 sp|P0A6T9|GCSH\_ECOLI Glycine cleavage system H protein OS=Escherichia coli (strain K12) GN=gcvH PE=1 SV=2  
 sp|P68688|GLRX1\_ECOLI Glutaredoxin-1 OS=Escherichia coli (strain K12) GN=grxA PE=1 SV=1  
 sp|P0AC92|GNSA\_ECOLI Protein gnsA OS=Escherichia coli (strain K12) GN=gnsA PE=3 SV=1  
 sp|P0A703|HYBF\_ECOLI Probable hydrogenase nickel incorporation protein hybF OS=Escherichia coli (strain K12) GN=hybF PE=3 SV=1  
 sp|C1P619|ILVX\_ECOLI Uncharacterized protein ilvX OS=Escherichia coli (strain K12) GN=ilvX PE=1 SV=1  
 sp|P0C0L9|ISCX\_ECOLI Protein iscX OS=Escherichia coli (strain K12) GN=iscX PE=1 SV=1  
 sp|Q6BF86|LDRA\_ECOLI Small toxic polypeptide ldrA/ldrC OS=Escherichia coli (strain K12) GN=ldrA PE=2 SV=1  
 sp|Q6BF87|LDRB\_ECOLI Small toxic polypeptide ldrB OS=Escherichia coli (strain K12) GN=ldrB PE=2 SV=1  
 sp|Q6BF25|LDRD\_ECOLI Small toxic polypeptide ldrD OS=Escherichia coli (strain K12) GN=ldrD PE=2 SV=1  
 sp|P0AD74|LPF2\_ECOLI Phenylalanyl--tRNA ligase operon leader peptide OS=Escherichia coli (strain K12) GN=pheM PE=4 SV=1  
 sp|P0ADF0|LPFS\_ECOLI Putative fruR/shl operon leader peptide OS=Escherichia coli (strain K12) GN=fuR PE=5 SV=1  
 sp|A8DYP9|LPFUR\_ECOLI Fur leader peptide OS=Escherichia coli (strain K12) GN=uof PE=1 SV=1  
 sp|P0AD72|LPF\_ECOLI Phe operon leader peptide OS=Escherichia coli (strain K12) GN=pheL PE=4 SV=1  
 sp|P60995|LPHI\_ECOLI His operon leader peptide OS=Escherichia coli (strain K12) GN=hisL PE=3 SV=1  
 sp|P0ADF3|LPRH\_ECOLI Putative rho operon leader peptide OS=Escherichia coli (strain K12) GN=rhoL PE=5 SV=1  
 sp|P0AD89|LPTN\_ECOLI Tryptophanase leader peptide OS=Escherichia coli (strain K12) GN=tnaL PE=4 SV=1  
 sp|P0AD92|LPW\_ECOLI Trp operon leader peptide OS=Escherichia coli (strain K12) GN=trpL PE=1 SV=1  
 sp|P0A917|OMPX\_ECOLI Outer membrane protein X OS=Escherichia coli (strain K12) GN=ompX PE=1 SV=1  
 sp|P02338|PRTL\_ECOLI Protamine-like protein OS=Escherichia coli (strain K12) GN=tpr PE=4 SV=2  
 sp|P69808|PTFB1\_ECOLI Fructose-like phosphotransferase enzyme IIB component 1 OS=Escherichia coli (strain K12) GN=fryB PE=1 SV=1  
 sp|P37188|PTKB\_ECOLI Galactitol-specific phosphotransferase enzyme IIB component OS=Escherichia coli (strain K12) GN=gatB PE=1 SV=2  
 sp|P0A7M9|RL31\_ECOLI 50S ribosomal protein L31 OS=Escherichia coli (strain K12) GN=rpmE PE=1 SV=1  
 sp|P0A7N4|RL32\_ECOLI 50S ribosomal protein L32 OS=Escherichia coli (strain K12) GN=rpmF PE=1 SV=2  
 sp|P0AFW2|RMF\_ECOLI Ribosome modulation factor OS=Escherichia coli (strain K12) GN=rmf PE=1 SV=1  
 sp|P0AF90|RRAB\_ECOLI Regulator of ribonuclease activity B OS=Escherichia coli (strain K12) GN=rraB PE=1 SV=1  
 sp|P07464|THGA\_ECOLI Galactoside O-acetyltransferase OS=Escherichia coli (strain K12) GN=lacA PE=1 SV=1  
 sp|P0A8H8|YACG\_ECOLI UPF0243 zinc-binding protein yacG OS=Escherichia coli (strain K12) GN=yacG PE=1 SV=1  
 sp|P0A8K5|YAEF\_ECOLI UPF0253 protein yaeP OS=Escherichia coli (strain K12) GN=yaeP PE=1 SV=1  
 sp|P0AAS7|YBCJ\_ECOLI Uncharacterized protein ybcJ OS=Escherichia coli (strain K12) GN=ybcJ PE=1 SV=1  
 sp|P0AAS9|YBDD\_ECOLI Uncharacterized protein ybdD OS=Escherichia coli (strain K12) GN=ybdD PE=4 SV=1  
 sp|P0A8J4|YBED\_ECOLI UPF0250 protein ybeD OS=Escherichia coli (strain K12) GN=ybeD PE=1 SV=1  
 sp|P41039|YBII\_ECOLI Uncharacterized protein YbiI OS=Escherichia coli (strain K12) GN=ybiI PE=1 SV=1  
 sp|P0AAX3|YBIJ\_ECOLI Uncharacterized protein YbiJ OS=Escherichia coli (strain K12) GN=ybiJ PE=3 SV=1

sp|P0AB14|YCCJ\_ECOLI Uncharacterized protein yccJ OS=Escherichia coli (strain K12) GN=yccJ PE=4 SV=1  
sp|P21361|YCI\_GECOLI Uncharacterized protein yciG OS=Escherichia coli (strain K12) GN=yciG PE=1 SV=1  
sp|P58094|YCIX\_ECOLI Uncharacterized protein yciX OS=Escherichia coli (strain K12) GN=yciX PE=4 SV=2  
sp|A5A614|YCIZ\_ECOLI UPF0509 protein yciZ OS=Escherichia coli (strain K12) GN=yciZ PE=3 SV=1  
sp|P38394|YDAE\_ECOLI Uncharacterized protein ydaE OS=Escherichia coli (strain K12) GN=ydaE PE=4 SV=1  
sp|P0ACW0|YDAF\_ECOLI Uncharacterized protein ydaF OS=Escherichia coli (strain K12) GN=ydaF PE=4 SV=1  
sp|P0ACW8|YDFA\_ECOLI Uncharacterized protein ydfA OS=Escherichia coli (strain K12) GN=ydfA PE=4 SV=1  
sp|P29009|YDFB\_ECOLI Uncharacterized protein ydfB OS=Escherichia coli (strain K12) GN=ydfB PE=1 SV=1  
sp|P76231|YEAC\_ECOLI Uncharacterized protein yeaC OS=Escherichia coli (strain K12) GN=yeaC PE=4 SV=2  
sp|P76275|YEBW\_ECOLI Uncharacterized protein yebW OS=Escherichia coli (strain K12) GN=yebW PE=4 SV=2  
sp|P0AA31|YEDF\_ECOLI UPF0033 protein yedF OS=Escherichia coli (strain K12) GN=yedF PE=1 SV=1  
sp|P76322|YEDM\_ECOLI Uncharacterized protein yedM OS=Escherichia coli (strain K12) GN=yedM PE=1 SV=1  
sp|P33014|YEED\_ECOLI UPF0033 protein yeeD OS=Escherichia coli (strain K12) GN=yeeD PE=3 SV=1  
sp|P0AFT8|YEIW\_ECOLI UPF0153 protein yeiW OS=Escherichia coli (strain K12) GN=yeiW PE=3 SV=1  
sp|P77656|YFDK\_ECOLI Uncharacterized protein yfdK OS=Escherichia coli (strain K12) GN=yfdK PE=4 SV=1  
sp|P76516|YFDT\_ECOLI Uncharacterized protein yfdT OS=Escherichia coli (strain K12) GN=yfdT PE=4 SV=1  
sp|P52102|YFHL\_ECOLI Uncharacterized ferredoxin-like protein yfhL OS=Escherichia coli (strain K12) GN=yfhL PE=1 SV=1  
sp|Q46905|YFGC\_ECOLI Ferredoxin-like protein ygcO OS=Escherichia coli (strain K12) GN=ygcO PE=3 SV=2  
sp|P65292|YGDI\_ECOLI Uncharacterized lipoprotein ygdI OS=Escherichia coli (strain K12) GN=ygdI PE=4 SV=1  
sp|Q46789|YGEI\_ECOLI Uncharacterized protein ygeI OS=Escherichia coli (strain K12) GN=ygeI PE=4 SV=1  
sp|P0ADU2|YGIN\_ECOLI Probable quinol monooxygenase ygiN OS=Escherichia coli (strain K12) GN=ygiN PE=1 SV=1  
sp|P67624|YHEU\_ECOLI UPF0270 protein yheU OS=Escherichia coli (strain K12) GN=yheU PE=3 SV=1  
sp|P0ADW8|YHEV\_ECOLI Uncharacterized protein yheV OS=Escherichia coli (strain K12) GN=yheV PE=4 SV=1  
sp|C1P621|YJEV\_ECOLI Uncharacterized protein yjeV OS=Escherichia coli (strain K12) GN=yjeV PE=1 SV=1  
sp|P77087|YLCE\_ECOLI Putative uncharacterized protein ylcE OS=Escherichia coli (strain K12) GN=ylycE PE=5 SV=1  
sp|Q47268|YLCH\_ECOLI Uncharacterized protein ylcH in lambdoid DLP12 prophage region OS=Escherichia coli (strain K12) GN=ylycH PE=4 SV=1  
sp|P56614|YMDF\_ECOLI Uncharacterized protein ymdF OS=Escherichia coli (strain K12) GN=ymdF PE=1 SV=1  
sp|P0CD93|YMD\_ECOLI Putative uncharacterized protein ymjD OS=Escherichia coli (strain K12) GN=yymjD PE=5 SV=1  
sp|P64448|YNBE\_ECOLI Uncharacterized protein ynbE OS=Escherichia coli (strain K12) GN=yynbE PE=4 SV=1  
sp|C1P600|YNBG\_ECOLI Uncharacterized protein ynbG OS=Escherichia coli (strain K12) GN=yynbG PE=1 SV=1  
sp|P76138|YNEL\_ECOLI Putative HTH-type transcriptional regulator yneL OS=Escherichia coli (strain K12) GN=yynel PE=5 SV=1  
sp|P0AEB7|YOAB\_ECOLI RutC family protein yoaB OS=Escherichia coli (strain K12) GN=yyoaB PE=3 SV=1  
sp|P67338|YOA\_H\_ECOLI UPF0181 protein yoaH OS=Escherichia coli (strain K12) GN=yyoaH PE=3 SV=1  
sp|Q2EET0|YPDJ\_ECOLI Putative uncharacterized protein ypdJ OS=Escherichia coli (strain K12) GN=yypdJ PE=5 SV=1  
sp|C1P610|YDPK\_ECOLI Uncharacterized membrane protein ypdK OS=Escherichia coli (strain K12) GN=yypdK PE=1 SV=1  
sp|A5A621|YPFM\_ECOLI Uncharacterized protein ypfM OS=Escherichia coli (strain K12) GN=yypfM PE=1 SV=1  
sp|C1P613|YQEL\_ECOLI Uncharacterized protein yqeL OS=Escherichia coli (strain K12) GN=yyqeL PE=1 SV=1  
sp|P0A9W6|YRBA\_ECOLI Uncharacterized protein YrbA OS=Escherichia coli (strain K12) GN=yyrba PE=1 SV=1  
sp|C1P618|YRBN\_ECOLI Uncharacterized protein yrbN OS=Escherichia coli (strain K12) GN=yyrbn PE=1 SV=1  
sp|P0AC51|ZUR\_ECOLI Zinc uptake regulation protein OS=Escherichia coli (strain K12) GN=zur PE=1 SV=1

#### Supplementary Table S4. Proteins without a DnaK binding site.

sp|P36560|ASR\_ECOLI Acid shock protein OS=Escherichia coli (strain K12) GN=asr PE=1 SV=3  
sp|P60995|LPHI\_ECOLI His operon leader peptide OS=Escherichia coli (strain K12) GN=hisL PE=3 SV=1  
sp|P03061|LPIV\_ECOLI IlvBN operon leader peptide OS=Escherichia coli (strain K12) GN=ivbL PE=4 SV=1  
sp|P0AD86|LPT\_ECOLI Thr operon leader peptide OS=Escherichia coli (strain K12) GN=thrL PE=3 SV=1  
sp|P76096|MOKB\_ECOLI Regulatory protein mokB OS=Escherichia coli (strain K12) GN=mokB PE=4 SV=1  
sp|P64496|YOAG\_ECOLI Protein yoaG OS=Escherichia coli (strain K12) GN=yyoaG PE=1 SV=1  
sp|C1P606|YOEI\_ECOLI Uncharacterized protein yoel OS=Escherichia coli (strain K12) GN=yyoel PE=1 SV=1  
sp|C1P620|YSHB\_ECOLI Uncharacterized protein yshB OS=Escherichia coli (strain K12) GN=yyshB PE=1 SV=1  
sp|P0AC51|ZUR\_ECOLI Zinc uptake regulation protein OS=Escherichia coli (strain K12) GN=zur PE=1 SV=1

#### Supplementary Table S5. Proteins without a DnaJ binding site.

|                                           | DnaK          | DnaJ           |
|-------------------------------------------|---------------|----------------|
| Number of Proteins with Unique Sites      | 1,701         | 4,112          |
| Total number of Unique Binding Sites      | 4,526 (4.7%)  | 69,595 (31.0%) |
| Average start point (% of protein length) | 47.76 ± 29.55 | 49.22 ± 27.80  |
| Average $\Delta\Delta G_{\text{binding}}$ | -7.07 ± 1.84  | -4.47 ± 2.12   |
| Average number of sites per protein       | 2.66 ± 2.14   | 16.93 ± 14.26  |
| % Binding site coverage                   | 0.84 ± 1.01   | 5.32 ± 3.17    |

**Supplementary Table S6.** Statistical data regarding unique DnaJ and unique DnaK binding sites.

|                                           | K site with Overlapping J site | J site with Overlapping K site | Identical                          |
|-------------------------------------------|--------------------------------|--------------------------------|------------------------------------|
| Number of Proteins with Overlapping Sites | 4,192                          | 4,198                          | 3,739                              |
| Total number Overlapping Sites            | 91,032 (95.3%)                 | 154,935 (69.0%)                | 24,653 (J: 11%; K: 25.8%)          |
| Average start point (% of protein length) | 45.83 ± 28.41                  | 46.07 ± 28.02                  | 44.40 ± 28.82                      |
| Average $\Delta\Delta G_{\text{binding}}$ | -7.45 ± 2.09                   | -4.79 ± 2.32                   | J: -4.97 ± 2.41<br>K: -7.56 ± 2.16 |
| Average number of sites per protein       | 21.72 ± 18.23                  | 36.90 ± 30.78                  | 6.59 ± 6.17                        |
| % Binding site coverage                   | 6.81 ± 4.15                    | 11.42 ± 6.60                   | 2.12 ± 1.82                        |

**Supplementary Table S7.** Statistical data regarding overlapping and identical DnaK/J binding sites.
